# Supplementary material
Source: publisher figshare collection journal article supplement (https://tandf.figshare.com/articles/dataset/_/5085085)
Supplement: Supplementary file 1 [file 1]

Table 1. Primer sequences of various genes studied

| Name                   | Primer Sequence (5'-3')              | Gene size) |
|------------------------|--------------------------------------|------------|
| Tbet-forward           | GTTCAACCAGCACCAGACAGAG               | 135 bp.    |
| Tbet-reverse           | TGGTCCACCAAGACCACATC                 |            |
| IDO1-forward           | CAAAGCAATCCCCACTGTATCC               | 129bp      |
| IDO1-reverse           | ACAAAGTCACGCATCCTCTTAAA              |            |
| IDO2-forward           | CCAGAAGGACCGTTGGAAATC                | 89 bp      |
| IDO2-reverse           | ACTGTCACTAGGATGAAGCCC                |            |
| PDL-1-forward          | GCTTCTCAATGTGACCAGCA                 | 211bp      |
| PDL-1-reverse          | GAGGAGGACCGTGGACACTA                 |            |
| STAT3-forward          | AATATAGCCGATTCTGCAAGAG               | 95 bp      |
| STAT3-reverse          | TGGCTTCTCAAGATACCTGCTC               |            |
| CD40-forward           | TGTCATCTGTGAAAAGGTGGTC               | 120 bp     |
| CD40-reverse           | ACTGGAGCAGCGGTGTTATG                 |            |
| CXCL12-forward         | TGCATCAGTGACGGTAAACCA                | 118 bp     |
| CXCL12-reverse         | CACAGTTTGGAGTGTTGAGGAT               |            |
| IL-12-forward          | TGGTTTGCCATCGTTTTGCTG                | 123 bp.    |
| IL-12-reverse          | ACAGGTGAGGTTCACTGTTTCT               |            |
| IL-1 $\beta$ -forward  | ACAGCAGCACATCAACAAGAG                | 204 bp     |
| IL-1 $\beta$ -reverse  | ATGCGAACGTCACACACCAG                 |            |
| IFN- $\gamma$ -forward | ATGAACGCTACACACTGCATC                | 182 bp.    |
| IFN- $\gamma$ -reverse | CCATCCTTTTGCCAGTTCTC                 |            |
| GzmB- forward          | CCACTCTCGACCCTACATGG                 | 142 bp     |
| GzmB- reverse          | GGCCCCCAAAGTGACATTTATT               |            |
| TNF $\alpha$ - forward | TTCTGTCTACTGAACTTCGGGGTGATCGGTCC     | 306 bp.    |
| TNF $\alpha$ -reverse  | GTATGAGATAGCAAATCGGCTGACGGTGTGG<br>G |            |
| IL-5-forward           | TCAGGGGCTAGACATACTGAAG               | 168 bp.    |
| IL-5-reverse           | CCAAGGAACTCTTGCAGGTAAT               |            |
| IL-4- forward          | CCCCAGCTAGTTGTCATCCTG                | 78 bp.     |
| IL-4-reverse           | CAAGTGATTTTTGTGCGCATCCG              |            |
| IL-13- forward         | CGGCAGCATGGTATGGAGTG                 | 85 bp.     |

|                       |                                 |         |
|-----------------------|---------------------------------|---------|
| IL-13-reverse         | ATTGCAATTGGAGATGTTGGTCAG        |         |
| GATA-3-forward        | GGATGTAAGTCGAGGCCCAAG           | 117 bp. |
| GATA-3-reverse        | ATTGCAAAGGTAGTGCCCGGTA          |         |
| TGF- $\beta$ -forward | CTCCCGTGGCTTCTAGTGC             | 105 bp. |
| TGF- $\beta$ -reverse | GCCTTAGTTTGGACAGGATCTG          |         |
| IL-10- forward        | GCTCTTACTGACTGGCATGAG           | 105 bp. |
| IL-10-reverse         | CGCAGCTCTAGGAGCATGTG            |         |
| Foxp3- forward        | AGCAGTGTGGACCGTAGATGA           | 77 bp.  |
| Foxp3-reverse         | GGCAGGGATTGGAGCACTT             |         |
| IL-21- forward        | CAGGCTAAGAGCTTGTATCGTTTGG       | 248 bp  |
| IL-21- reverse        | AGGACTGGCTGAGTCTTGAGCAC         |         |
| RORrt- forward        | CGCGGAGCAGACACACTTA             | 167 bp  |
| RORrt- reverse        | CCCTGGACCTCTGTTTTGGC            |         |
| CCL20- forward        | TACAGACGCCTCTTCCTCCA            | 147 bp  |
| CCL20- reverse        | CAGCCCTTTTCACCCAGTTC            |         |
| perforin-forward      | CTGCCACTCGGTCAGAATG             | 88 bp   |
| perforin- reverse     | CGGAGGGTAGTCACATCCAT            |         |
| FOXO3- forward        | CTGGGGGAACCTGTCCTATG            | 210 bp  |
| FOXO3- reverse        | TCATTCTGAACGCGCATGAAG           |         |
| Eomes- forward        | GGCCCCTATGGCTCAAATTCC           | 62 bp   |
| Eomes- reverse        | CCTGCCCTGTTTGGTGATG             |         |
| Bcl-6- forward        | ATGTACAGCCATCTCCCGCT            | 134 bp  |
| Bcl-6- reverse        | TTAGGGACTTGCCTGGCACT            |         |
| IL-7- forward         | TTCCTCCACTGATCCTTGTCT           | 126 bp  |
| IL-7- reverse         | AGCAGCTTCCTTTGTATCATCAC         |         |
| IL-15- forward        | AGAGGCCAACTGGATAGATGT           | 105 bp  |
| IL-15- reverse        | AGAGCACGTTTCTTACTGTTCA          |         |
| IL-6- forward         | GACAAAGCCAGAGTCCTTCAGAGAGATACAG | 220 bp  |
| IL-6- reverse         | TTGGATGGTCTTGGTCCTTAGCCAC       |         |
| GAPDH- forward        | AGGTCGGTGTGAACGGATTTG           | 98 bp   |
| GAPDH- reverse        | GGGGTCGTTGATGGCAACA             |         |
