# Supplementary material
Source: publisher figshare collection journal article supplement (https://tandf.figshare.com/articles/dataset/_/5085085)
Supplement: Supplementary file 2 [file 1]

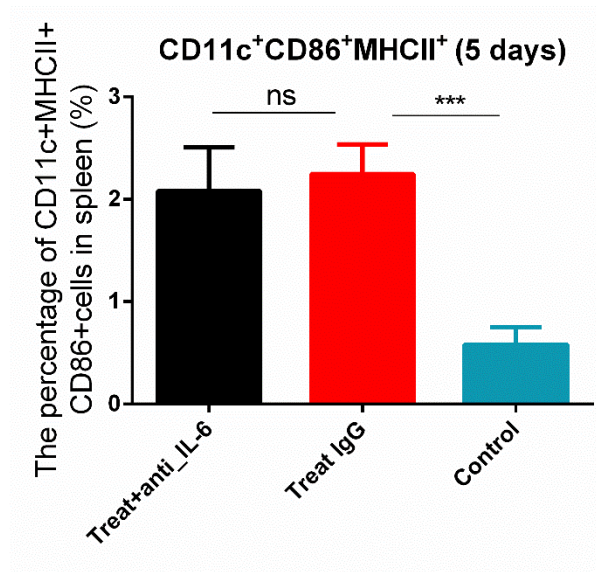

**Supplementary Figure 1.** The number of DC maturation was no significant difference compared to that in the cryo-thermal therapy on day 5.

The flow cytometry analysis was performed to examine the percentages of DCs (MHCII+CD86+CD11c+) in the treated mice received injection of neutralizing IL-6 antibody. The percentage of the DCs remained at higher level with no significant difference on day 5 after the cryo-thermal therapy with IL-6 neutralization in comparison to that with the isotype IgG antibody; Data was shown as mean  $\pm$  SD. \* $p < 0.05$ , \*\* $p < 0.01$ , \*\*\* $p < 0.001$  by two-way ANOVA with the Bonferroni correction.

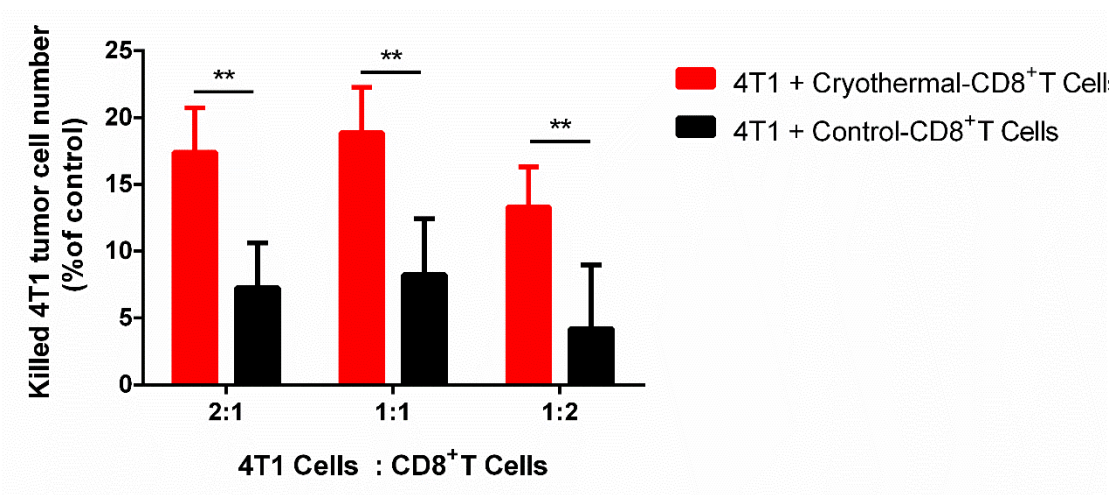

**Supplementary Figure 2.** anti-tumor response in CD8+ T cells with high IFN- $\gamma$ , granzyme b, and perforin levels after “acute” phase, the cytotoxic activity of CD8+ T cells was measured by using CCK8 assay. The ability of killing 4T1 tumor cells of CD8+ T cells on day 14 after the cryo-thermal therapy was

*obviously enhanced compared with CD8<sup>+</sup> T cells from the tumor-bearing mice. Data was shown as mean  $\pm$  SD. \* $p$  < 0.05, \*\* $p$  < 0.01, \*\*\* $p$  < 0.001 by student  $t$  test.*
