# Supplementary material
Source: publisher figshare collection journal article supplement (https://tandf.figshare.com/articles/dataset/_/5085085)
Supplement: Supplementary file 3 [file 1]

Archive with 2 entries (2 files):
- IHYT_1332394_SupplementalFile.pdf
- IHYT_1332394_SupplementalFile_Table.pdf
